# Supplementary material for: A combined theoretical and experimental study on the mechanism of spiro-adamantyl-1,2-dioxetanone decomposition
Source: Royal Society of Chemistry journal article supplement (doi:10.1039/c6ra26575h), 2017-01-01

## ***Supporting Information***

*(Total of 11 pages)  
for*

# **A Combined Theoretical and Experimental Study on the Mechanism of *spiro*-Adamantyl-1,2-Dioxetanone Decomposition**

Pooria Farahani,<sup>\*,†</sup> Marcelo A. Oliveira,<sup>†</sup> Ignacio Fdez. Galván<sup>‡,§</sup> and  
Wilhelm J. Baader<sup>\*,†</sup>

<sup>†</sup>*Instituto de Química, Departamento de Química Fundamental, Universidade de São Paulo,  
C.P. 05508-000, São Paulo, SP, Brazil*

<sup>‡</sup>*Department of Chemistry – Ångström, Uppsala University, P.O. Box 518, SE-751 20 Uppsala,  
Sweden,*

<sup>§</sup>*Uppsala Center for Computational Chemistry, Uppsala University, P.O. Box  
518, SE-751 20 Uppsala, Sweden*

E-mail: [wjbaader@iq.usp.br](mailto:wjbaader@iq.usp.br); [fpooria@iq.usp.br](mailto:fpooria@iq.usp.br)

February 17, 2017

\* To whom correspondence should be addressed

† São Paulo

‡ Uppsala

§ UC<sub>3</sub>

## Table of contents

|                                                                                                                                                                                                                                                                                                                |     |
|----------------------------------------------------------------------------------------------------------------------------------------------------------------------------------------------------------------------------------------------------------------------------------------------------------------|-----|
| <b>Table S1.</b> Cartesian coordinates (in Å) of the optimized <i>spiro</i> -adamantyl-1,2-dioxetanone structures at the MS-CASPT2/ANO-L-VDZP level of theory.....                                                                                                                                             | S3  |
| <b>Table S2.</b> Energies (in kcal/mol) of the low-lying singlet and triplet states at the optimized transition states geometries of <i>spiro</i> -adamantyl-1,2-dioxetanone relative to the ground-state energy of the reactant (React). The energies are at MS-CASPT2/ANO-L-VTZP//MS-CASPT2/ANO-L-VDZP ..... | S7  |
| <b>Table S3.</b> Zero-point vibrational energies (in kcal/mol) of the low-lying singlet and triplet states at the optimized transition states geometries of <i>spiro</i> -adamantyl-1,2-dioxetanone relative to the ground-state energy of the reactant (React) .....                                          | S7  |
| <b>Table S4.</b> Gibbs free energies (in kcal/mol) of the low-lying singlet and triplet states at the optimized geometries of <i>spiro</i> -adamantyl-1,2-dioxetanone relative to the ground-state energy of the reactant (React).....                                                                         | S8  |
| <b>Table S5.</b> Spin-orbit interactions (cm <sup>-1</sup> ) of the main transition structures computed at the MS-CASPT2/ANO-L-VTZP .....                                                                                                                                                                      | S9  |
| <b>Fig. S1.</b> The minimum energy path of the first triplet state computed CASPT2/ANO-L-VTZP//CASSCF/ANO-L-VDZP .....                                                                                                                                                                                         | S10 |
| <b>Fig. S2.</b> Pseudo-natural (average) orbitals of the important geometries optimized at the SA-CASSCF(16in13)/ANO-L-VTZP .....                                                                                                                                                                              | S11 |

**Table S1.** Cartesian coordinates (in Å) of the optimized *spiro*-adamantyl-1,2-dioxetanone structures at the MS-CASPT2/ANO-L-VDZP level of theory.

**Reactant:**

|   |             |             |             |
|---|-------------|-------------|-------------|
| C | -1.73343029 | 1.31749906  | 0.26622410  |
| C | -0.55005144 | 1.37895995  | -0.70393947 |
| C | 0.70225032  | 1.13217885  | 0.13506309  |
| C | 0.71029738  | -0.27738875 | 0.72340421  |
| C | 0.53816449  | -1.33254839 | -0.38959049 |
| C | -0.77897447 | -1.09114116 | -1.13705049 |
| H | 0.54258390  | -2.32346776 | 0.06834031  |
| H | 1.37303944  | -1.30371886 | -1.09133825 |
| C | -1.95888936 | -1.14193294 | -0.15412996 |
| C | -1.77838324 | -0.07015906 | 0.93022060  |
| H | -2.01978256 | -2.13059428 | 0.30527787  |
| H | -2.89699960 | -0.97774132 | -0.68817524 |
| H | -2.65832493 | 1.50885114  | -0.27808886 |
| H | -1.62518642 | 2.10254517  | 1.01382424  |
| C | -0.69927452 | 0.29371142  | -1.79100719 |
| H | -0.48020260 | 2.36115111  | -1.17261975 |
| H | -1.60528415 | 0.49929901  | -2.36417719 |
| H | 0.13449107  | 0.32401591  | -2.49401050 |
| H | -0.91101162 | -1.85491591 | -1.90677833 |
| C | -0.47114369 | -0.34140095 | 1.69576750  |
| H | 1.65389721  | -0.44347640 | 1.24424288  |
| H | -0.50180237 | -1.32525811 | 2.16417958  |
| H | -0.32459070 | 0.39329374  | 2.48675786  |
| H | -2.61291943 | -0.10140480 | 1.63086051  |
| C | 1.99743721  | 1.57855268  | -0.49062569 |
| O | 2.21688126  | 2.56784250  | 0.46373415  |
| O | 0.91102067  | 2.17341597  | 1.15902481  |
| O | 2.69853843  | 1.30674221  | -1.42524030 |

**TS<sub>S0</sub>:**

|   |             |             |             |
|---|-------------|-------------|-------------|
| C | -1.78874585 | 1.29372132  | 0.32902745  |
| C | -0.58911058 | 1.43358238  | -0.61855466 |
| C | 0.69353981  | 1.19889219  | 0.20811815  |
| C | 0.70937518  | -0.22288117 | 0.80206234  |
| C | 0.60628740  | -1.26173564 | -0.32447637 |
| C | -0.68311303 | -1.02012828 | -1.12488877 |
| H | 0.58735396  | -2.25491740 | 0.12548964  |
| H | 1.47426557  | -1.21739582 | -0.97282038 |
| C | -1.89082122 | -1.15390938 | -0.18718724 |
| C | -1.79259748 | -0.11606966 | 0.94114928  |

|   |             |             |             |
|---|-------------|-------------|-------------|
| H | -1.92213372 | -2.15984553 | 0.23431048  |
| H | -2.81490614 | -1.00517735 | -0.74829329 |
| H | -2.70400979 | 1.46101063  | -0.23941398 |
| H | -1.74801206 | 2.05183809  | 1.10853441  |
| C | -0.67262045 | 0.38877322  | -1.73875889 |
| H | -0.55003159 | 2.44203939  | -1.03619289 |
| H | -1.58940172 | 0.56269235  | -2.30287852 |
| H | 0.15634694  | 0.49794967  | -2.43150859 |
| H | -0.74794581 | -1.75629447 | -1.92712651 |
| C | -0.49953455 | -0.35213740 | 1.73915157  |
| H | 1.63867078  | -0.35772094 | 1.36044576  |
| H | -0.50139558 | -1.35396011 | 2.16981255  |
| H | -0.42046237 | 0.35502217  | 2.56228354  |
| H | -2.64812732 | -0.21309891 | 1.61073872  |
| C | 1.94228831  | 1.46526319  | -0.66896466 |
| O | 2.57823293  | 2.57987651  | -0.29657527 |
| O | 0.67991803  | 2.12300032  | 1.23643971  |
| O | 2.36904032  | 0.81452063  | -1.60977361 |

**TS<sup>C-C</sup><sub>SO</sub> :**

|   |             |             |             |
|---|-------------|-------------|-------------|
| C | -1.75470327 | 1.32243876  | 0.39431412  |
| C | -0.54498509 | 1.48338964  | -0.54651518 |
| C | 0.71415804  | 1.17005319  | 0.27842109  |
| C | 0.68210044  | -0.29133730 | 0.76356310  |
| C | 0.53933021  | -1.24555336 | -0.43143312 |
| C | -0.75421433 | -0.93780116 | -1.19995892 |
| H | 0.52526618  | -2.27259856 | -0.06338302 |
| H | 1.40253937  | -1.16350313 | -1.09403039 |
| C | -1.96153243 | -1.09360289 | -0.26473548 |
| C | -1.82479779 | -0.12162551 | 0.91603084  |
| H | -2.02250126 | -2.12025584 | 0.10244456  |
| H | -2.88500505 | -0.89343292 | -0.81213337 |
| H | -2.66555798 | 1.57290111  | -0.15140024 |
| H | -1.67784019 | 2.02226636  | 1.22726482  |
| C | -0.69795164 | 0.50413438  | -1.72326402 |
| H | -0.49194423 | 2.51130608  | -0.90438419 |
| H | -1.61721581 | 0.74467532  | -2.25975907 |
| H | 0.11824947  | 0.61529924  | -2.43512139 |
| H | -0.84829946 | -1.62520244 | -2.04262500 |
| C | -0.53777494 | -0.44275921 | 1.69026820  |
| H | 1.59932283  | -0.49122209 | 1.31199442  |
| H | -0.57083072 | -1.46479155 | 2.07093609  |
| H | -0.43589091 | 0.21706992  | 2.55261644  |

|   |             |             |             |
|---|-------------|-------------|-------------|
| H | -2.68452937 | -0.22506641 | 1.58064466  |
| C | 2.15589373  | 1.41204690  | -0.49471139 |
| O | 1.97812401  | 2.06740155  | -1.59911697 |
| O | 0.89857618  | 2.04367317  | 1.30573630  |
| O | 3.17834710  | 1.03850056  | -0.02513088 |

**TS<sup>C-C</sup><sub>S1</sub> :**

|   |             |             |             |
|---|-------------|-------------|-------------|
| C | -1.80562566 | 1.29294002  | 0.30734491  |
| C | -0.57114919 | 1.44904334  | -0.61081380 |
| C | 0.66680034  | 1.22127313  | 0.27310217  |
| C | 0.69221109  | -0.21527533 | 0.82316212  |
| C | 0.59197233  | -1.25217627 | -0.30847853 |
| C | -0.68655811 | -1.01283852 | -1.12649134 |
| H | 0.55775135  | -2.24236523 | 0.14885108  |
| H | 1.46540242  | -1.21913610 | -0.94884495 |
| C | -1.91260082 | -1.15626376 | -0.21472967 |
| C | -1.82822466 | -0.11987676 | 0.91413816  |
| H | -1.95408758 | -2.16390632 | 0.20402445  |
| H | -2.82900865 | -1.00953781 | -0.79015402 |
| H | -2.70186085 | 1.45483695  | -0.29301482 |
| H | -1.79966704 | 2.04612334  | 1.09217439  |
| C | -0.65885871 | 0.39940139  | -1.73171290 |
| H | -0.54062189 | 2.45605127  | -1.02810084 |
| H | -1.57991476 | 0.58113576  | -2.28794853 |
| H | 0.16634893  | 0.49889486  | -2.42741734 |
| H | -0.73754480 | -1.74634709 | -1.93290735 |
| C | -0.54949696 | -0.36159269 | 1.73366896  |
| H | 1.60222798  | -0.36688499 | 1.40450316  |
| H | -0.55575721 | -1.37221735 | 2.14409012  |
| H | -0.49665243 | 0.32935250  | 2.57215812  |
| H | -2.69633603 | -0.21433281 | 1.56922361  |
| C | 2.21458888  | 1.53220242  | -0.74022441 |
| O | 2.73948512  | 2.47943497  | -0.16961790 |
| O | 0.67836030  | 2.11196005  | 1.30144030  |
| O | 2.38444798  | 0.81914151  | -1.66700313 |

**TS<sup>C-C</sup><sub>T1</sub> :**

|   |             |             |             |
|---|-------------|-------------|-------------|
| C | -1.80646585 | 1.29272179  | 0.30761467  |
| C | -0.57233932 | 1.44981725  | -0.60985061 |
| C | 0.66967506  | 1.22532136  | 0.27408154  |
| C | 0.69142884  | -0.21415076 | 0.82464058  |
| C | 0.59261914  | -1.25015825 | -0.30784934 |
| C | -0.68623222 | -1.01208860 | -1.12568712 |

|   |             |             |             |
|---|-------------|-------------|-------------|
| H | 0.56083300  | -2.24099297 | 0.14826947  |
| H | 1.46561496  | -1.21457733 | -0.94872946 |
| C | -1.91238117 | -1.15633143 | -0.21429300 |
| C | -1.82887614 | -0.11991545 | 0.91459424  |
| H | -1.95338516 | -2.16406787 | 0.20431483  |
| H | -2.82864743 | -1.01016185 | -0.79010172 |
| H | -2.70243570 | 1.45362369  | -0.29346698 |
| H | -1.80204234 | 2.04613318  | 1.09224785  |
| C | -0.65855709 | 0.40014175  | -1.73077274 |
| H | -0.54313266 | 2.45655626  | -1.02771534 |
| H | -1.57868188 | 0.58180145  | -2.28858781 |
| H | 0.16775658  | 0.49942527  | -2.42509007 |
| H | -0.73674447 | -1.74563779 | -1.93210581 |
| C | -0.55017260 | -0.36116243 | 1.73403990  |
| H | 1.60100393  | -0.36646677 | 1.40636805  |
| H | -0.55610712 | -1.37214985 | 2.14367089  |
| H | -0.49793441 | 0.32898476  | 2.57323549  |
| H | -2.69708138 | -0.21463631 | 1.56951135  |
| C | 2.20871756  | 1.52616735  | -0.74022447 |
| O | 2.74910992  | 2.46970750  | -0.17231979 |
| O | 0.67594923  | 2.11058827  | 1.29967115  |
| O | 2.38414012  | 0.82054826  | -1.67504371 |

**Table S2.** Energies (in kcal/mol) of the low-lying singlet and triplet states at the optimized transition states geometries of spiro-adamanty1-1,2-dioxetanone relative to the ground-state energy of the reactant (React). The energies are at MS-CASPT2/ANO-L-VTZP//MS-CASPT2/ANO-L-VDZP.

|    | REAC   | TS_OO_S0 | TS_CC_S0 | TS_CC_T1 | TS_CC_S1 |
|----|--------|----------|----------|----------|----------|
| S0 | 0.00   | 30.98    | 23.95    | 9.71     | 8.67     |
| S1 | 91.49  | 32.88    | 34.59    | 26.28    | 26.12    |
| S2 | 133.31 | 47.75    | 50.92    | 73.51    | 75.05    |
| T1 | 68.59  | 30.09    |          | 23.80    | 23.52    |
| T2 | 127.45 | 35.20    |          | 37.13    | 36.69    |

**Table S3.** Zero-point vibrational energies (in kcal/mol) of the low-lying singlet and triplet states at the optimized transition states geometries of *spiro*-adamnty1-1,2-dioxetanone relative to the ground-state energy of the reactant (React).

|    | REAC   | TS_OO_S0 | TS_CC_S0 | TS_CC_T1 | TS_CC_S1 |
|----|--------|----------|----------|----------|----------|
| S0 | 0.00   | 29.98    | 21.97    | 7.73     | 6.69     |
| S1 | 91.49  | 31.88    | 32.61    | 24.30    | 24.14    |
| S2 | 133.31 | 46.75    | 48.94    | 71.53    | 73.07    |
| T1 | 68.59  | 29.09    |          | 21.82    | 21.54    |
| T2 | 127.45 | 34.20    |          | 35.15    | 34.71    |

**Table S4.** Gibbs free energies (in kcal/mol) of the low-lying singlet and triplet states at the optimized geometries of *spiro*-adamantyl-1,2-dioxetanone relative to the ground-state energy of the reactant (React).

|    | REAC   | TS_OO_S0 | TS_CC_S0 | TS_CC_T1 | TS_CC_S1 |
|----|--------|----------|----------|----------|----------|
| S0 | 0.00   | 30.43    | 22.11    | 7.87     | 6.83     |
| S1 | 91.49  | 32.33    | 32.75    | 24.44    | 24.28    |
| S2 | 133.31 | 47.20    | 49.08    | 71.67    | 73.21    |
| T1 | 68.59  | 29.54    |          | 21.96    | 21.68    |
| T2 | 127.45 | 34.65    |          | 35.29    | 34.85    |



**Table S5.** Spin-orbit interactions (cm<sup>-1</sup>) of the main transition states computed at the MS-CASPT2(16in13)/ANO-L-VTZP.

| State 1                                | State 2                                | $ \langle \Psi_1   H_{SO}   \Psi_2 \rangle $ (cm <sup>-1</sup> ) |                                       |                                       |                                       |
|----------------------------------------|----------------------------------------|------------------------------------------------------------------|---------------------------------------|---------------------------------------|---------------------------------------|
|                                        |                                        | $\text{TS}_{S_0}^{\text{O}-\text{O}}$                            | $\text{TS}_{S_0}^{\text{C}-\text{C}}$ | $\text{TS}_{S_1}^{\text{C}-\text{C}}$ | $\text{TS}_{T_1}^{\text{C}-\text{C}}$ |
| <b>T<sub>1</sub>(M<sub>s</sub>=-1)</b> | <b>S<sub>0</sub>(M<sub>s</sub>=0)</b>  | 1.351                                                            | 31.332                                | 31.945                                | 31.659                                |
| <b>T<sub>1</sub>(M<sub>s</sub>=0)</b>  | <b>S<sub>0</sub>(M<sub>s</sub>=0)</b>  | 1.727                                                            | 52.262                                | 50.194                                | 50.154                                |
| <b>T<sub>1</sub>(M<sub>s</sub>=1)</b>  | <b>S<sub>0</sub>(M<sub>s</sub>=0)</b>  | 1.351                                                            | 31.332                                | 31.945                                | 31.659                                |
| <b>T<sub>2</sub>(M<sub>s</sub>=-1)</b> | <b>S<sub>0</sub>(M<sub>s</sub>=0)</b>  | 32.496                                                           | 1.809                                 | 8.019                                 | 7.719                                 |
| <b>T<sub>2</sub>(M<sub>s</sub>=0)</b>  | <b>S<sub>0</sub>(M<sub>s</sub>=0)</b>  | 51.045                                                           | 1.251                                 | 6.766                                 | 6.777                                 |
| <b>T<sub>2</sub>(M<sub>s</sub>=1)</b>  | <b>S<sub>0</sub>(M<sub>s</sub>=0)</b>  | 32.496                                                           | 1.809                                 | 8.019                                 | 7.719                                 |
| <b>T<sub>1</sub>(M<sub>s</sub>=-1)</b> | <b>S<sub>1</sub>(M<sub>s</sub>=0)</b>  | 32.660                                                           | 1.103                                 | 1.428                                 | 1.460                                 |
| <b>T<sub>1</sub>(M<sub>s</sub>=0)</b>  | <b>S<sub>1</sub>(M<sub>s</sub>=0)</b>  | 50.909                                                           | <1.000                                | <1.000                                | 1.053                                 |
| <b>T<sub>1</sub>(M<sub>s</sub>=1)</b>  | <b>S<sub>1</sub>(M<sub>s</sub>=0)</b>  | 31.660                                                           | 1.103                                 | 1.428                                 | 1.460                                 |
| <b>T<sub>2</sub>(M<sub>s</sub>=-1)</b> | <b>S<sub>1</sub>(M<sub>s</sub>=0)</b>  | 2.559                                                            | 32.980                                | 28.882                                | 28.841                                |
| <b>T<sub>2</sub>(M<sub>s</sub>=0)</b>  | <b>S<sub>1</sub>(M<sub>s</sub>=0)</b>  | 1.230                                                            | 45.208                                | 48.730                                | 48.825                                |
| <b>T<sub>2</sub>(M<sub>s</sub>=1)</b>  | <b>S<sub>1</sub>(M<sub>s</sub>=0)</b>  | 2.559                                                            | 32.980                                | 28.882                                | 28.841                                |
| <b>T<sub>1</sub>(M<sub>s</sub>=-1)</b> | <b>S<sub>2</sub>(M<sub>s</sub>=0)</b>  | 42.314                                                           | 3.770                                 | <1.000                                | <1.000                                |
| <b>T<sub>1</sub>(M<sub>s</sub>=0)</b>  | <b>S<sub>2</sub>(M<sub>s</sub>=0)</b>  | 15.666                                                           | 12.947                                | <1.000                                | <1.000                                |
| <b>T<sub>1</sub>(M<sub>s</sub>=1)</b>  | <b>S<sub>2</sub>(M<sub>s</sub>=0)</b>  | 42.314                                                           | 3.770                                 | <1.000                                | <1.000                                |
| <b>T<sub>2</sub>(M<sub>s</sub>=-1)</b> | <b>S<sub>2</sub>(M<sub>s</sub>=0)</b>  | <1.000                                                           | 21.748                                | 31.712                                | 32.527                                |
| <b>T<sub>2</sub>(M<sub>s</sub>=0)</b>  | <b>S<sub>2</sub>(M<sub>s</sub>=0)</b>  | <1.000                                                           | 53.951                                | 34.357                                | 34.735                                |
| <b>T<sub>2</sub>(M<sub>s</sub>=1)</b>  | <b>S<sub>2</sub>(M<sub>s</sub>=0)</b>  | <1.000                                                           | 21.748                                | 31.712                                | 32.527                                |
| <b>T<sub>2</sub>(M<sub>s</sub>=-1)</b> | <b>T<sub>1</sub>(M<sub>s</sub>=-1)</b> | 50.858                                                           | 44.640                                | 48.362                                | 48.518                                |
| <b>T<sub>2</sub>(M<sub>s</sub>=0)</b>  | <b>T<sub>1</sub>(M<sub>s</sub>=-1)</b> | 32.376                                                           | 33.031                                | 28.584                                | 28.581                                |
| <b>T<sub>2</sub>(M<sub>s</sub>=1)</b>  | <b>T<sub>1</sub>(M<sub>s</sub>=0)</b>  | 32.376                                                           | 33.031                                | 28.584                                | 28.581                                |
| <b>T<sub>2</sub>(M<sub>s</sub>=-1)</b> | <b>T<sub>1</sub>(M<sub>s</sub>=0)</b>  | 32.376                                                           | 33.031                                | 28.584                                | 28.581                                |
| <b>T<sub>2</sub>(M<sub>s</sub>=0)</b>  | <b>T<sub>1</sub>(M<sub>s</sub>=1)</b>  | 32.376                                                           | 33.031                                | 28.583                                | 28.581                                |
| <b>T<sub>2</sub>(M<sub>s</sub>=1)</b>  | <b>T<sub>1</sub>(M<sub>s</sub>=1)</b>  | 50.858                                                           | 44.640                                | 48.362                                | 48.518                                |

**Fig. S1.** The minimum energy path of the first triplet state computed CASPT2/ANO-L-VTZP//CASSCF/ANO-L-VDZP.

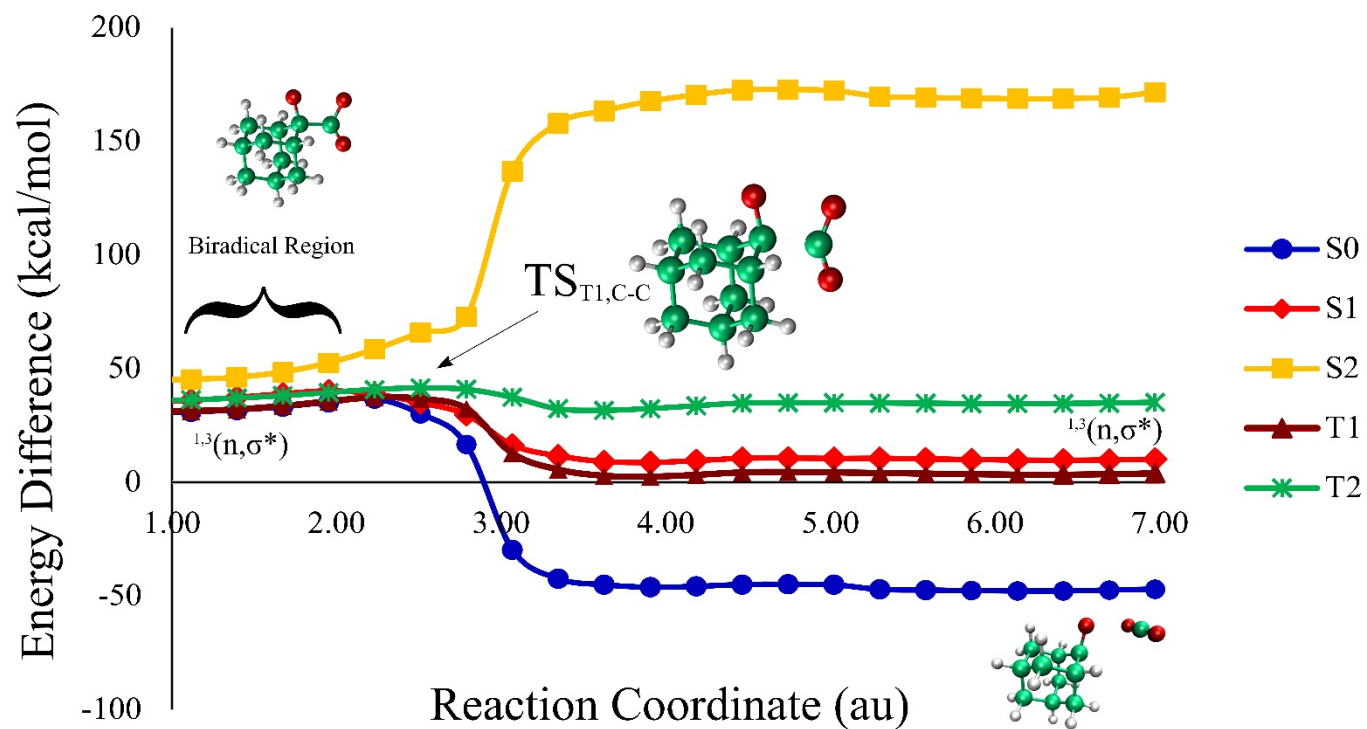

**Fig. S2.** Pseudo-natural (average) orbitals of the important transition state geometries optimized at the SA-CASSCF(16in13)/ANO-L-VTZP.

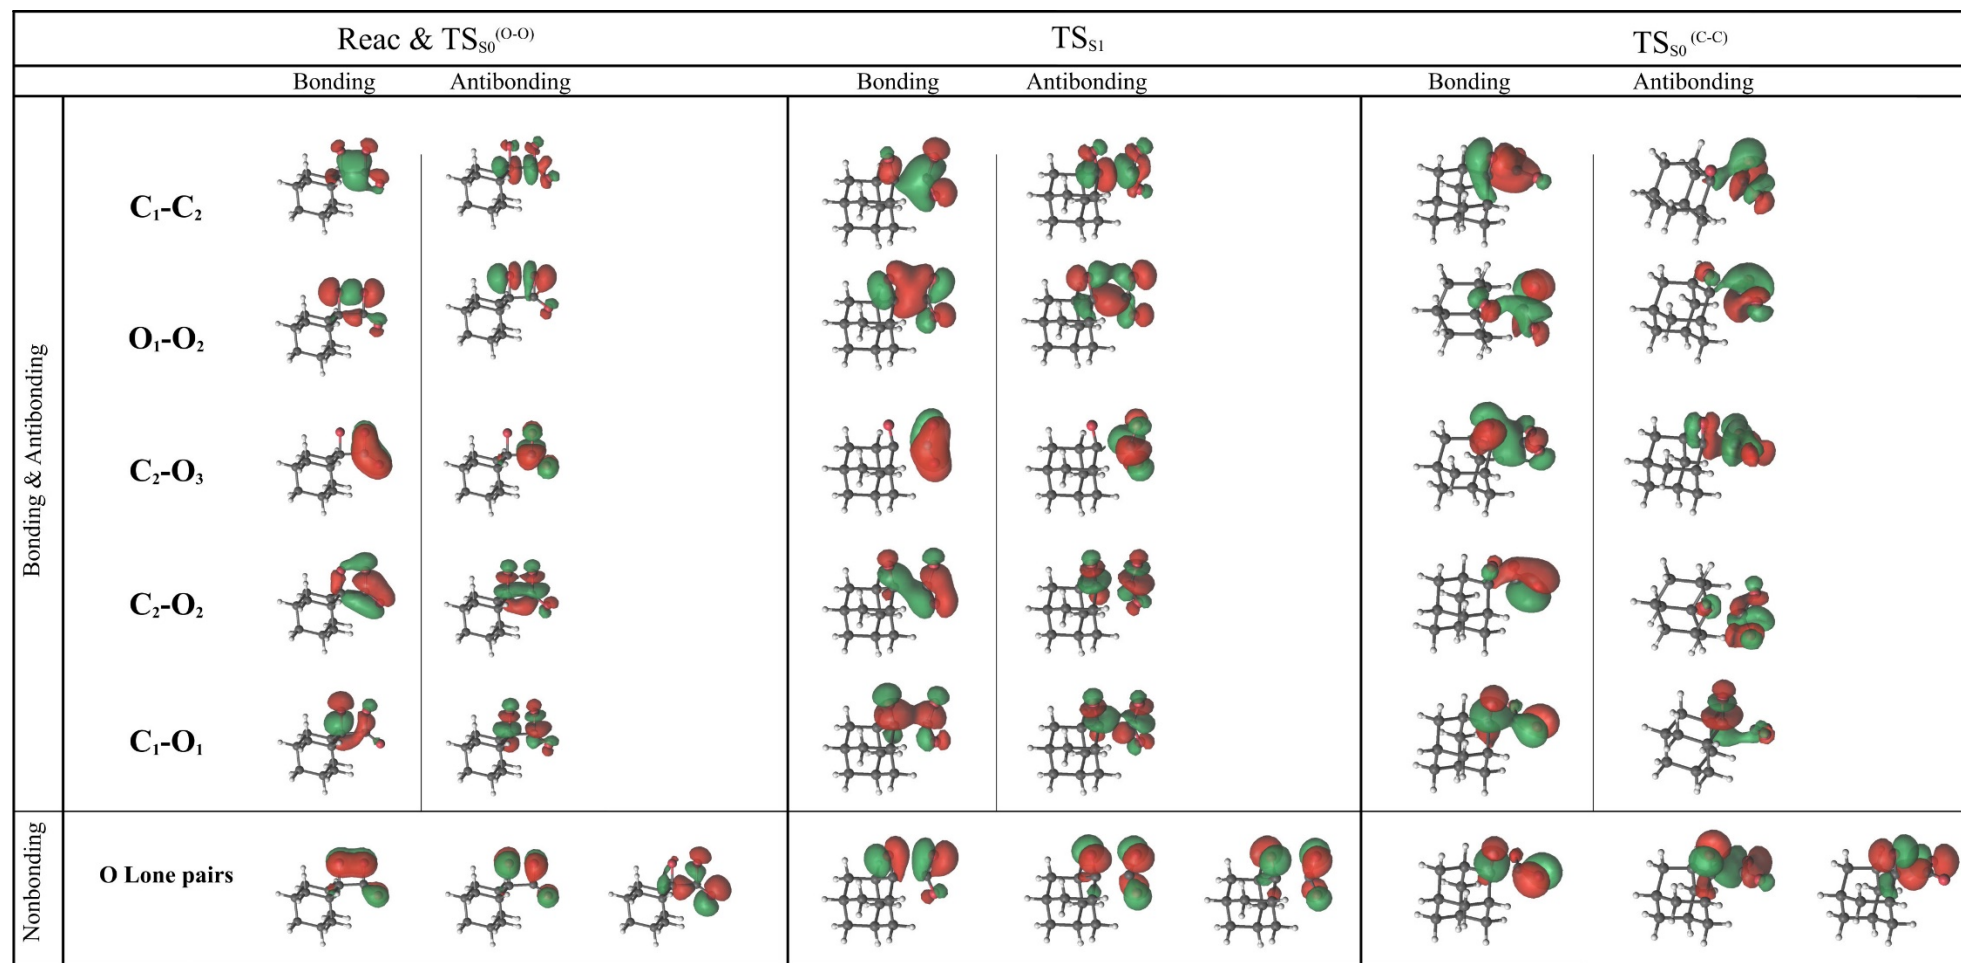

Supplement: c6ra26575h1.pdf [file c6ra26575h1.pdf]
